# Supplementary material
Source: Springer Nature journal article supplement (https://www.springermedizin.de/resource/supplementary/12888_2007_461_MOESM3_ESM.pdf/9483320)
Supplement: MOESM3 [file 9483320]

Step 1:

Literature was searched for potential first aid strategies:

- Medical and research literature
- Existing suicide intervention programs
- Lay literature (books, pamphlets and websites)

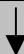

Step 2:

Identical and near-identical statements were clustered and repetition eliminated.

Statements about first aid actions were grouped into categories.

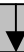

Step 3:

Working group considered the suitability of each statement for a questionnaire item.

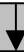

Step 4:

Questionnaire implemented on internet for use by Delphi expert panels in 3 rounds.

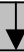

Step 5:

Finished guidelines distributed to panel members for comment.
